# Supplementary material for: Transcriptome Analyses Reveal the Aroma Terpeniods Biosynthesis Pathways of Primula forbesii Franch. and the Functional Characterization of the PfDXS2 Gene
Source: Int J Mol Sci. 2023 Aug 12;24(16):12730. doi: 10.3390/ijms241612730 (PMC10454305; doi:10.3390/ijms241612730)
Supplement: Supplementary file 1 [file ijms-24-12730-s001.zip › Table S.xlsx]

## Sheet: Table S1
Table S1 Quality statistics of filtered reads
Sample	Reads number	Bases number	GC content (%)	≥ Q30 (%)	Mapped reads	Mapped Ratio (%)
S1-1	21661437	6498431100	45.11	0.9339	16426981	75.84
S1-2	18100240	5430072000	45.05	0.9347	13633930	75.32
S1-3	18850939	5655281700	45.14	0.9361	14043462	74.5
S2-1	19090646	5727193800	44.6	0.9364	14511330	76.01
S2-2	20099547	6029864100	44.61	0.9358	15303477	76.14
S2-3	19357324	5807197200	44.66	0.9351	14772535	76.31
S3-1	27974533	8392359900	45.13	0.9393	19654917	70.26
S3-2	28636599	8590979700	45.19	0.9358	19913505	69.54
S3-3	30757312	9227193600	45.31	0.936	20716118	67.35
S4-1	20132908	6039872400	44.42	0.9362	15060301	74.8
S4-2	21757632	6527289600	45.9	0.9368	15045223	69.15
S4-3	19054903	5716470900	44.25	0.9399	14295189	75.02

## Sheet: Table S2
Table S2 Summary of unigenes involved to secondary metabolism
Pathway of secondary metabolism	Pathway ID	Number of unigenes
Phenylpropanoid biosynthesis	ko00940	200
Flavonoid biosynthesis	ko00941	81
Terpenoid backbone biosynthesis	ko00900	65
Carotenoid biosynthesis	ko00906	52
Ubiquinone and other terpenoid-quinone biosynthesis	ko00130	51
Isoquinoline alkaloid biosynthesis	ko00950	48
Zeatin biosynthesis	ko00908	44
Steroid biosynthesis	ko00100	43
Stilbenoid, diarylheptanoid and gingerol biosynthesis	ko00945	40
Sesquiterpenoid and triterpenoid biosynthesis	ko00909	35
Diterpenoid biosynthesis	ko00904	33
Isoflavonoid biosynthesis	ko00943	24
Flavone and flavonol biosynthesis	ko00944	23
Monoterpenoid biosynthesis	ko00902	15
Limonene and pinene degradation	ko00903	14
Indole alkaloid biosynthesis	ko00901	6
Anthocyanin biosynthesis	ko00942	3

## Sheet: Table S3
Table S3 Number of differentially expressed genes in different databases
Sample	COG	GO	KEGG	KOG	Pfam	Swiss-Prot	TrEMBL	eggNOG	Nr	All
S1 vs. S2	722	1891	1565	1169	1851	1673	2298	1959	2296	2313
S1 vs. S3	2314	6253	5211	4237	5959	5389	7496	6427	7487	7540
S1 vs. S4	2043	5381	4442	3526	5213	4716	6450	5543	6449	6500
S2 vs. S3	1621	4844	3927	3145	4544	4086	5940	4977	5929	5984
S2 vs. S4	1670	4578	3722	2789	4421	4045	5541	4745	5535	5585
S3 vs. S4	1590	4391	3548	2674	4224	3858	5373	4537	5370	5424

## Sheet: Table S4
Table S4-a Significantly enriched DEGs (S1 vs. S2) based on KEGG annotation
NO.	Pathway ID	Pathway Name	Level 1	Level 2	DEG number	P-value	Q-value
1	ko04075	Plant hormone signal transduction	Environmental Information Processing	Signal transduction	57	0.00362338	0.0711962
2	ko00940	Phenylpropanoid biosynthesis	Metabolism	Biosynthesis of other secondary metabolites	39	2.66257e-05	0.00313903
3	ko00040	Pentose and glucuronate interconversions	Metabolism	Carbohydrate metabolism	34	0.00203937	0.0480862
4	ko00561	Glycerolipid metabolism	Metabolism	Lipid metabolism	21	0.0122506	0.160476
5	ko00941	Flavonoid biosynthesis	Metabolism	Biosynthesis of other secondary metabolites	18	0.000816999	0.0401834
6	ko04712	Circadian rhythm - plant	Organismal Systems	Environmental adaptation	15	0.00708919	0.104472
7	ko00073	Cutin, suberine and wax biosynthesis	Metabolism	Lipid metabolism	14	0.00130348	0.0401834
8	ko00945	Stilbenoid, diarylheptanoid and gingerol biosynthesis	Metabolism	Biosynthesis of other secondary metabolites	11	0.00136336	0.0401834
9	ko00910	Nitrogen metabolism	Metabolism	Energy metabolism	9	0.00597424	0.100619
10	ko00944	Flavone and flavonol biosynthesis	Metabolism	Biosynthesis of other secondary metabolites	6	0.0219021	0.258214
11	ko00402	Benzoxazinoid biosynthesis	Metabolism	Biosynthesis of other secondary metabolites	4	0.0334531	0.358541
Table S4-b Significantly enriched DEGs (S1 vs. S3) based on KEGG annotation
NO.	Pathway ID	Pathway Name	Level 1	Level 2	DEG number	P-value	Q-value
1	ko03010	Ribosome	Genetic Information Processing	Translation	158	1.35409e-07	1.78169e-05
2	ko04075	Plant hormone signal transduction	Environmental Information Processing	Signal transduction	150	0.0483977	0.756724
3	ko00562	Inositol phosphate metabolism	Metabolism	Carbohydrate metabolism	51	0.0689442	0.835594
4	ko04712	Circadian rhythm - plant	Organismal Systems	Environmental adaptation	41	0.00015411	0.0101388
5	ko03060	Protein export	Genetic Information Processing	Folding, sorting and degradation	38	0.0391129	0.756724
6	ko00195	Photosynthesis	Metabolism	Energy metabolism	29	0.00437786	0.144008
7	ko00730	Thiamine metabolism	Metabolism	Metabolism of cofactors and vitamins	26	0.000377885	0.0165739
8	ko00910	Nitrogen metabolism	Metabolism	Energy metabolism	17	0.0431877	0.756724
Table S4-c Significantly enriched DEGs (S1 vs. S4) based on KEGG annotation
NO.	Pathway ID	Pathway Name	Level 1	Level 2	DEG number	P-value	Q-value
1	ko04626	Plant-pathogen interaction	Organismal Systems	Environmental adaptation	168	0.00501863	0.0779209
2	ko04075	Plant hormone signal transduction	Environmental Information Processing	Signal transduction	158	3.14607e-06	0.000130258
3	ko03010	Ribosome	Genetic Information Processing	Translation	155	1.36445e-11	1.6948e-09
4	ko00940	Phenylpropanoid biosynthesis	Metabolism	Biosynthesis of other secondary metabolites	69	0.0466567	0.413947
5	ko00564	Glycerophospholipid metabolism	Metabolism	Lipid metabolism	49	0.0241413	0.2726
6	ko02010	ABC transporters	Environmental Information Processing	Membrane transport	44	0.0290457	0.300649
7	ko00941	Flavonoid biosynthesis	Metabolism	Biosynthesis of other secondary metabolites	35	0.00400008	0.0779209
8	ko00073	Cutin, suberine and wax biosynthesis	Metabolism	Lipid metabolism	34	2.07322e-06	0.000128758
9	ko04712	Circadian rhythm - plant	Organismal Systems	Environmental adaptation	33	0.00466409	0.0779209
10	ko00592	alpha-Linolenic acid metabolism	Metabolism	Lipid metabolism	25	0.00354702	0.0779209
11	ko00945	Stilbenoid, diarylheptanoid and gingerol biosynthesis	Metabolism	Biosynthesis of other secondary metabolites	18	0.0217015	0.269555
12	ko00565	Ether lipid metabolism	Metabolism	Lipid metabolism	16	0.0436069	0.413947
13	ko00402	Benzoxazinoid biosynthesis	Metabolism	Biosynthesis of other secondary metabolites	8	0.0142972	0.197318
Table S4-d Significantly enriched DEGs (S2 vs. S3) based on KEGG annotation
NO.	Pathway ID	Pathway Name	Level 1	Level 2	DEG number	P-value	Q-value
1	ko03010	Ribosome	Genetic Information Processing	Translation	155	6.09155e-17	7.82283e-15
2	ko04075	Plant hormone signal transduction	Environmental Information Processing	Signal transduction	129	0.00109499	0.035155
3	ko00040	Pentose and glucuronate interconversions	Metabolism	Carbohydrate metabolism	68	0.00720666	0.154248
4	ko00190	Oxidative phosphorylation	Metabolism	Energy metabolism	67	0.0153607	0.246579
5	ko00940	Phenylpropanoid biosynthesis	Metabolism	Biosynthesis of other secondary metabolites	64	0.0182445	0.26033
6	ko02010	ABC transporters	Environmental Information Processing	Membrane transport	43	0.00444568	0.114184
7	ko00562	Inositol phosphate metabolism	Metabolism	Carbohydrate metabolism	39	0.105629	0.934849
8	ko00941	Flavonoid biosynthesis	Metabolism	Biosynthesis of other secondary metabolites	34	0.000710382	0.0304094
9	ko00945	Stilbenoid, diarylheptanoid and gingerol biosynthesis	Metabolism	Biosynthesis of other secondary metabolites	22	5.58978e-05	0.00358922
10	ko00030	Pentose phosphate pathway	Metabolism	Carbohydrate metabolism	13	0.000710382	0.0304094
Table S4-e Significantly enriched DEGs (S2 vs. S4) based on KEGG annotation
NO.	Pathway ID	Pathway Name	Level 1	Level 2	DEG number	P-value	Q-value
1	ko04626	Plant-pathogen interaction	Organismal Systems	Environmental adaptation	169	4.34573e-07	1.00638e-05
2	ko04075	Plant hormone signal transduction	Environmental Information Processing	Signal transduction	161	2.73849e-12	1.58544e-10
3	ko03010	Ribosome	Genetic Information Processing	Translation	141	2.00014e-12	1.58544e-10
4	ko00500	Starch and sucrose metabolism	Metabolism	Carbohydrate metabolism	85	7.4874e-05	0.00123852
5	ko00940	Phenylpropanoid biosynthesis	Metabolism	Biosynthesis of other secondary metabolites	82	1.99846e-07	5.78502e-06
6	ko00040	Pentose and glucuronate interconversions	Metabolism	Carbohydrate metabolism	64	0.0209038	0.140661
7	ko00052	Galactose metabolism	Metabolism	Carbohydrate metabolism	47	0.0207665	0.140661
8	ko00941	Flavonoid biosynthesis	Metabolism	Biosynthesis of other secondary metabolites	45	2.36188e-09	9.11604e-08
9	ko02010	ABC transporters	Environmental Information Processing	Membrane transport	39	0.024296	0.140661
10	ko00511	Other glycan degradation	Metabolism	Glycan biosynthesis and metabolism	36	0.0060708	0.0540719
11	ko00600	Sphingolipid metabolism	Metabolism	Lipid metabolism	34	0.0223446	0.140661
12	ko04712	Circadian rhythm - plant	Organismal Systems	Environmental adaptation	33	0.00025274	0.00325162
13	ko00073	Cutin, suberine and wax biosynthesis	Metabolism	Lipid metabolism	25	0.00155917	0.0164124
14	ko00531	Glycosaminoglycan degradation	Metabolism	Glycan biosynthesis and metabolism	25	0.0210424	0.140661
15	ko00604	Glycosphingolipid biosynthesis - ganglio series	Metabolism	Glycan biosynthesis and metabolism	22	0.0108243	0.0895246
16	ko00945	Stilbenoid, diarylheptanoid and gingerol biosynthesis	Metabolism	Biosynthesis of other secondary metabolites	21	0.000137933	0.0019964
17	ko00592	alpha-Linolenic acid metabolism	Metabolism	Lipid metabolism	20	0.023511	0.140661
18	ko00944	Flavone and flavonol biosynthesis	Metabolism	Biosynthesis of other secondary metabolites	10	0.0373291	0.196469
19	ko00402	Benzoxazinoid biosynthesis	Metabolism	Biosynthesis of other secondary metabolites	9	0.000884531	0.0102419
20	ko00591	Linoleic acid metabolism	Metabolism	Lipid metabolism	9	0.00378276	0.0365003
21	ko00901	Indole alkaloid biosynthesis	Metabolism	Biosynthesis of other secondary metabolites	4	0.0358728	0.196469
Table S4-f Significantly enriched DEGs (S3 vs. S4) based on KEGG annotation
NO.	Pathway ID	Pathway Name	Level 1	Level 2	DEG number	P-value	Q-value
1	ko04626	Plant-pathogen interaction	Organismal Systems	Environmental adaptation	150	2.02893e-05	0.00060868
2	ko04075	Plant hormone signal transduction	Environmental Information Processing	Signal transduction	123	0.000108833	0.00261199
3	ko00040	Pentose and glucuronate interconversions	Metabolism	Carbohydrate metabolism	79	1.99997e-07	1.19998e-05
4	ko00940	Phenylpropanoid biosynthesis	Metabolism	Biosynthesis of other secondary metabolites	78	1.05018e-07	1.19998e-05
5	ko00500	Starch and sucrose metabolism	Metabolism	Carbohydrate metabolism	75	0.000871796	0.0149451
6	ko00941	Flavonoid biosynthesis	Metabolism	Biosynthesis of other secondary metabolites	38	1.16365e-06	4.65458e-05
7	ko00561	Glycerolipid metabolism	Metabolism	Lipid metabolism	37	0.0468234	0.384007
8	ko02010	ABC transporters	Environmental Information Processing	Membrane transport	36	0.0288701	0.32764
9	ko00600	Sphingolipid metabolism	Metabolism	Lipid metabolism	31	0.0327851	0.32764
10	ko00945	Stilbenoid, diarylheptanoid and gingerol biosynthesis	Metabolism	Biosynthesis of other secondary metabolites	20	0.000134598	0.00269196
11	ko00073	Cutin, suberine and wax biosynthesis	Metabolism	Lipid metabolism	19	0.0498396	0.384007
12	ko00290	Valine, leucine and isoleucine biosynthesis	Metabolism	Amino acid metabolism	11	0.0354943	0.32764
13	ko00402	Benzoxazinoid biosynthesis	Metabolism	Biosynthesis of other secondary metabolites	8	0.00289904	0.0434857
14	ko00591	Linoleic acid metabolism	Metabolism	Lipid metabolism	7	0.0344976	0.32764

## Sheet: Table S5
Table S5 Expression profiles and annotation information of DETs involved in terpenoids terpenoid backbone biosynthesis pathway
NO.	Gene Name	Gene ID	Pathway	FPKM value				KO ID	Annotation
				S1	S2	S3	S4
1	PfDXS1	c89133.graph_c0	MEP	5.93	6.55	11.62	10.15	K01662	1-deoxy-D-xylulose-5-phosphate synthase
2	PfDXS2	c89059.graph_c0	MEP	49.5	219.38	435.9	208.79	K01662	1-deoxy-D-xylulose-5-phosphate synthase
3	PfDXS3	c82011.graph_c0	MEP	33.09	38.76	68.87	50.01	K01662	1-deoxy-D-xylulose-5-phosphate synthase
4	PfDXR	c63152.graph_c0	MEP	46.18	48.91	75.67	75.2	K00099	1-deoxy-D-xylulose-5-phosphate reductoisomerase
5	PfMCT	c67490.graph_c0	MEP	60.21	67.39	44.69	37.42	K00991	2-C-methyl-D-erythritol 4-phosphate cytidylyltransferase
6	PfCMK	c82552.graph_c0	MEP	23.69	31.24	26.92	22.25	K00919	4-diphosphocytidyl-2-C-methyl-D-erythritol kinase
7	PfMDS	c76144.graph_c0	MEP	95.67	143.27	111.47	137.34	K01770	2-C-methyl-D-erythritol 2,4-cyclodipho- sphate synthase
8	PfHDS	c67354.graph_c0	MEP	62.06	108.22	159.18	91.09	K03526	(E)-4-hydroxy-3-methylbut-2-enyl-diphosphate synthase
9	PfHDR1	c72479.graph_c0	MEP	77.64	87.98	111.77	164.59	K03527	4-hydroxy-3-methylbut-2-enyl diphosphate reductase
10	PfHDR2	c72479.graph_c1	MEP	54.91	51.95	99.91	127.15	K03527	4-hydroxy-3-methylbut-2-enyl diphosphate reductase
11	PfHDR3	c89135.graph_c1	MEP	263.37	333.15	273.84	217.37	K03527	4-hydroxy-3-methylbut-2-enyl diphosphate reductase
12	PfIDI1	c84827.graph_c0	MEP	156.14	135.82	82.17	91.33	K01823	Isopentenyl-diphosphate delta-isomerase
13	PfIDI2	c88456.graph_c0	MVA	13.42	7.73	4.51	3.84	K06981	Isopentenyl-diphosphate delta-isomerase
14	PfGPPS1	c79201.graph_c0	MEP	45.27	42.92	60.67	54.7	K13789	Geranyl pyrophosphate synthase
15	PfGPPS2	c86521.graph_c2	MEP	78.73	72	83.99	88.23	K13789	Geranyl pyrophosphate synthase
16	PfGPPS3	c85838.graph_c0	MEP	14.35	20.14	22.28	17.78	K14066	Geranyl pyrophosphate synthase
17	PfGPPS4	c83620.graph_c0	MEP	3.18	4.28	6.44	4	K00787	Geranyl pyrophosphate synthase
18	PfGPPS5	c84775.graph_c0	MEP	187.49	202.33	114.11	94.88	K00787	Geranyl pyrophosphate synthase
19	PfGPPS6	c87758.graph_c1	MEP	3.43	3.96	8.65	7.84	K00787	Geranyl pyrophosphate synthase
20	PfAACT1	c27792.graph_c0	MVA	13.63	15.26	5.43	9.86	K00626	acetyl-CoA C-acetyltransferase
21	PfAACT2	c27814.graph_c0	MVA	32.27	56.85	41.57	53.53	K00626	acetyl-CoA C-acetyltransferase
22	PfAACT3	c80454.graph_c0	MVA	70.91	67.47	71.03	104.63	K00626	acetyl-CoA C-acetyltransferase
23	PfHMGS	c62904.graph_c1	MVA	4.02	2.7	3.55	2.85	K01641	hydroxymethylglutaryl- CoA synthase
24	PfHMGR1	c76370.graph_c0	MVA	19.62	24.81	74.53	57.89	K00021	hydroxymethylglutaryl-CoA reductase
25	PfHMGR2	c83678.graph_c1	MVA	93.36	219.65	269.2	54.38	K00021	hydroxymethylglutaryl-CoA reductase
26	PfHMGR3	c89615.graph_c2	MVA	14.16	20.54	24.87	12.2	K00021	hydroxymethylglutaryl-CoA reductase
27	PfHMGR4	c90802.graph_c1	MVA	70.68	80.79	126.34	110.45	K00021	hydroxymethylglutaryl-CoA reductase
28	PfMVK	c119416.graph_c0	MVA	0	0.04	0.08	0.85	K00869	mevalonate kinase
29	PfPMK	c86568.graph_c0	MVA	16.4	9.66	11.35	9.67	K00938	phosphomevalonate kinase
30	PfMVD	c80025.graph_c0	MVA	65.71	47.49	32.23	36.38	K01597	diphosphomevalonate decarboxylase
31	PfTPS1	c82208.graph_c0	MEP	218.49	287.72	154.84	156.93	K15803	Terpenoid synthase
32	PfTPS2	c86250.graph_c0	MEP	12.99	12.78	8.38	9.94	K15803	Terpenoid synthase
33	PfTPS3	c91274.graph_c0	MEP	3.78	3.76	9	7.1	K23810	Terpenoid synthase
34	PfTPS4	c90951.graph_c0	MEP	0.35	2.44	8.7	3.51	K23810	Terpenoid synthase
35	PfTPS5	c91245.graph_c0	MEP	1.44	1.44	2.38	1.89	K23810	Terpenoid synthase
36	PfTPS6	c87326.graph_c0	MEP	38.44	51.41	45.67	22.83	K23810	Terpenoid synthase
37	PfTPS7	c65064.graph_c0	MEP	0	1.33	0.19	0.18	K23810	Terpenoid synthase
38	PfTPS8	c72087.graph_c0	MEP	2.92	2.44	0.75	1.84	K23810	Terpenoid synthase
39	PfTPS9	c76782.graph_c0	MEP	20.36	63.95	81.35	106.67	K23810	Terpenoid synthase
40	PfTPS10	c83679.graph_c0	MEP	5.76	2.24	1.8	2.84	K04120	Terpenoid synthase
41	PfTPS11	c85474.graph_c0	MEP	3.72	3.41	4.84	4.13	K04120	Terpenoid synthase
42	PfTPS12	c83679.graph_c1	MEP	4.8	4.64	4.28	4.92	K04120	Terpenoid synthase
43	PfTPS13	c87495.graph_c0	MVA	2.66	2.18	2.32	2.12	K04121	Terpenoid synthase
44	PfTPS14	c87820.graph_c0	MVA	11.85	11.02	14.22	12.41	K04121	Terpenoid synthase

## Sheet: Table S6
Table S6 Classification of TFs in profile 5
Type	Family	count
PK	AGC_RSK-2	2
PK	CAMK_CDPK	3
PK	CMGC_CDK-CDK8	1
PK	CMGC_CDK-CRK7-CDK9	4
PK	CMGC_DYRK-PRP4	1
PK	CMGC_RCK	1
PK	PEK_GCN2	1
PK	RLK-Pelle_CrRLK1L-1	5
PK	RLK-Pelle_DLSV	1
PK	RLK-Pelle_Extensin	1
PK	RLK-Pelle_L-LEC	3
PK	RLK-Pelle_LRR-II	1
PK	RLK-Pelle_LRR-III	11
PK	RLK-Pelle_LRR-IV	1
PK	RLK-Pelle_LRR-IX	3
PK	RLK-Pelle_LRR-V	1
PK	RLK-Pelle_LRR-VI-2	2
PK	RLK-Pelle_LRR-VIII-1	1
PK	RLK-Pelle_LRR-XI-1	3
PK	RLK-Pelle_LRR-XIIIb	1
PK	RLK-Pelle_LRR-XIV	1
PK	RLK-Pelle_LRR-XV	1
PK	RLK-Pelle_LRR-Xb-1	2
PK	RLK-Pelle_LysM	1
PK	RLK-Pelle_PERK-1	6
PK	RLK-Pelle_PERK-2	1
PK	RLK-Pelle_RLCK-IXb	3
PK	RLK-Pelle_RLCK-V	1
PK	RLK-Pelle_RLCK-VI	3
PK	RLK-Pelle_RLCK-VIIa-1	3
PK	RLK-Pelle_RLCK-XI	1
PK	SCY1_SCYL1	1
PK	SCY1_SCYL2	1
PK	STE_STE-Pl	1
PK	STE_STE11	3
PK	TKL-Pl-1	1
PK	TKL-Pl-6	3
PK	TKL_CTR1-DRK-2	1
PK	TKL_Gdt	1
PK	TTK	1
PK	ULK_Fused	1
PK	WNK_NRBP	2
TF	B3	3
TF	B3-ARF	2
TF	BBR-BPC	1
TF	C2H2	5
TF	C3H	9
TF	CAMTA	1
TF	CPP	1
TF	DBB	1
TF	FAR1	2
TF	GRAS	5
TF	HB-BELL	1
TF	HB-HD-ZIP	1
TF	HB-WOX	2
TF	LOB	1
TF	MADS-M-type	2
TF	MADS-MIKC	1
TF	MYB-related	1
TF	NF-X1	1
TF	SBP	3
TF	TCP	2
TF	Trihelix	3
TF	WRKY	1
TF	bHLH	3
TR	ARID	1
TR	AUX/IAA	3
TR	DDT	2
TR	IWS1	2
TR	Jumonji	1
TR	MED6	1
TR	Others	3
TR	PHD	5
TR	RB	1
TR	SET	4
TR	SNF2	9
TR	SWI/SNF-BAF60b	3
TR	SWI/SNF-SWI3	1
TR	TAZ	1
TR	TRAF	1
TR	mTERF	1

## Sheet: Table S7
Table S7 Classification of TFs in profile 7
Type	Family	count
TF	B3	3
PK	RLK-Pelle_DLSV	2
TF	C2H2	2
TR	AUX/IAA	2
PK	CAMK_OST1L	1
PK	CMGC_MAPK	1
PK	CMGC_SRPK	1
PK	RLK-Pelle_L-LEC	1
TF	AP2/ERF-ERF	1
TF	C2C2-Dof	1
TF	C2C2-GATA	1
TF	HSF	1
TF	MYB-related	1
TF	OFP	1
TF	Trihelix	1
TF	bHLH	1
TR	GNAT	1
TR	Others	1
TR	mTERF	1

## Sheet: Table S8
Table S8 Classification of TFs in profile 8
Type	Family	count
PK	AGC_RSK-2	3
PK	CAMK_CAMKL-CHK1	1
PK	CMGC_DYRK-PRP4	1
PK	NEK	1
PK	RLK-Pelle_CR4L	2
PK	RLK-Pelle_CrRLK1L-1	2
PK	RLK-Pelle_LRR-I-2	1
PK	RLK-Pelle_LRR-II	1
PK	RLK-Pelle_LRR-III	1
PK	RLK-Pelle_LRR-IV	1
PK	RLK-Pelle_LRR-IX	3
PK	RLK-Pelle_LRR-V	2
PK	RLK-Pelle_LRR-VII-1	2
PK	RLK-Pelle_LRR-XI-1	5
PK	RLK-Pelle_LRR-XIIIa	1
PK	RLK-Pelle_LysM	1
PK	RLK-Pelle_PERK-2	1
PK	RLK-Pelle_RLCK-V	1
PK	RLK-Pelle_RLCK-VI	1
PK	RLK-Pelle_RLCK-XII-1	2
PK	TKL_CTR1-DRK-2	1
TF	C2C2-Dof	1
TF	C2C2-GATA	1
TF	C2H2	3
TF	GRAS	1
TF	HB-HD-ZIP	2
TF	HSF	1
TF	MYB-related	1
TF	NF-YC	1
TF	OFP	1
TF	SBP	1
TF	TCP	1
TF	TUB	2
TF	Trihelix	2
TR	AUX/IAA	2
TR	Others	3
TR	SET	1
TR	SNF2	1
TR	TAZ	1
TR	TRAF	1
TR	mTERF	2

## Sheet: Table S9
Table S9 Classification of TFs in profile 9
Type	Family	count
PK	AGC_RSK-2	1
PK	CAMK_AMPK	1
PK	CAMK_CDPK	9
PK	CAMK_OST1L	1
PK	CK1_CK1	1
PK	CK1_CK1-Pl	1
PK	CMGC_CDK-CRK7-CDK9	2
PK	CMGC_CDK-PITSLRE	1
PK	CMGC_DYRK-PRP4	1
PK	CMGC_GSK	1
PK	CMGC_GSKL	1
PK	CMGC_MAPK	2
PK	CMGC_Pl-Tthe	1
PK	Group-Pl-2	1
PK	Group-Pl-4	1
PK	IRE1	1
PK	NAK	1
PK	RLK-Pelle_CrRLK1L-1	5
PK	RLK-Pelle_DLSV	21
PK	RLK-Pelle_Extensin	1
PK	RLK-Pelle_L-LEC	7
PK	RLK-Pelle_LRK10L-2	1
PK	RLK-Pelle_LRR-III	2
PK	RLK-Pelle_LRR-IX	1
PK	RLK-Pelle_LRR-VI-2	2
PK	RLK-Pelle_LRR-VII-2	1
PK	RLK-Pelle_LRR-VIII-1	3
PK	RLK-Pelle_LRR-XI-1	7
PK	RLK-Pelle_LRR-XI-2	1
PK	RLK-Pelle_LRR-XII-1	4
PK	RLK-Pelle_LRR-Xa	1
PK	RLK-Pelle_LRR-Xb-1	2
PK	RLK-Pelle_LRR-Xb-2	1
PK	RLK-Pelle_LysM	4
PK	RLK-Pelle_RKF3	2
PK	RLK-Pelle_RLCK-II	1
PK	RLK-Pelle_RLCK-IV	2
PK	RLK-Pelle_RLCK-IXb	4
PK	RLK-Pelle_RLCK-VIII	1
PK	RLK-Pelle_RLCK-VIIa-1	1
PK	RLK-Pelle_RLCK-VIIa-2	10
PK	RLK-Pelle_RLCK-XI	1
PK	RLK-Pelle_RLCK-XII-1	1
PK	RLK-Pelle_RLCK-XV	1
PK	RLK-Pelle_RLCK-XVI	1
PK	RLK-Pelle_SD-2b	6
PK	RLK-Pelle_WAK	2
PK	RLK-Pelle_WAK_LRK10L-1	4
PK	STE_STE11	7
PK	STE_STE7	2
PK	TKL-Pl-1	1
PK	TKL-Pl-2	1
PK	TKL-Pl-4	5
PK	TKL-Pl-5	3
PK	TKL-Pl-6	1
PK	TKL_CTR1-DRK-2	1
PK	WNK_NRBP	3
TF	AP2/ERF-ERF	11
TF	B3-ARF	1
TF	BBR-BPC	1
TF	C2C2-Dof	3
TF	C2C2-GATA	2
TF	C2H2	17
TF	C3H	9
TF	CPP	1
TF	CSD	1
TF	EIL	1
TF	FAR1	8
TF	GARP-ARR-B	2
TF	GARP-G2-like	4
TF	GRAS	9
TF	GRF	1
TF	HB-BELL	2
TF	HB-HD-ZIP	5
TF	HB-other	6
TF	HSF	3
TF	LOB	2
TF	MADS-M-type	2
TF	MYB	6
TF	MYB-related	7
TF	NAC	12
TF	NF-X1	1
TF	NF-YA	4
TF	NF-YC	1
TF	PLATZ	1
TF	RWP-RK	3
TF	SBP	2
TF	TUB	3
TF	Tify	3
TF	Trihelix	6
TF	WRKY	11
TF	bHLH	8
TF	bZIP	9
TF	zf-HD	1
TR	GNAT	1
TR	HMG	1
TR	IWS1	3
TR	Jumonji	4
TR	Others	7
TR	PHD	6
TR	SET	2
TR	SNF2	6
TR	SWI/SNF-BAF60b	1
TR	TRAF	3

## Sheet: Table S10
Table S10 Primer sequences used for qRT-PCR
NO.	Genes Name	Gene ID	Primer (5'-3')
1	PfDXS3	c82011.graph_c0	Forward	AAGGTTCGATTGGAGGAT
			Reverse	GAGCCCAGCAAGAGCA
2	PfDXR	c63152.graph_c0	Forward	GTGCTCTTAGACGCATTATTT
			Reverse	TCTTCTTCCCCATGTTCC
3	PfCMK	c82552.graph_c0	Forward	AAAGACAGGAACGGACAA
			Reverse	GCAGCCCATAAAGCAG
4	PfHDS	c67354.graph_c0	Forward	GCTGACAAAGCCATTACC
			Reverse	ATCACCACGCACAGACAC
5	PfHDR3	c89135.graph_c1	Forward	TCACAACCCAACAGTCA
			Reverse	GATACCCAAGGGCAAG
6	PfIDI1	c84827.graph_c0	Forward	GTTCATAAAGGTGGACTAAA
			Reverse	TTGTCACCACGGATGT
7	PfGGPS3	c85838.graph_c0	Forward	GTGCTCTTAGACGCATTATTT
			Reverse	ATGTATGATAGACTGTGGGTGA
8	PfGGPS5	c84775.graph_c0	Forward	CGTGAAACGCTCAACCAG
			Reverse	CAAGACCGAAATACCCTCC
9	PfHMGR1	c76370.graph_c0	Forward	GCGAGGTAAATCGGTTGTG
			Reverse	GAGCCTGTGAGGTTTTTGAG
10	PfHMGR2	c83678.graph_c1	Forward	TTGCCAGCACGAATAGA
			Reverse	TCCCGAACCTAACCACA
11	PfHMGR4	c90802.graph_c1	Forward	AGGAGGTCGTGAGAAAGG
			Reverse	TACTCGCATGGGCATTA
12	PfTPS1	c82208.graph_c0	Forward	CTTGGTGATAAGCCTGAA
			Reverse	CCATAGCAGCAGACACG
13	PfGAPDH	—	Forward	AACGAGAAGGAATACACATC
			Reverse	CTAATGGAGCAAGACAGTT
